# Supplementary material for: Global research priorities for COVID-19 in maternal, reproductive and child health: Results of an international survey
Source: PLoS One. 2021 Sep 24;16(9):e0257516. doi: 10.1371/journal.pone.0257516 (PMC8462675; doi:10.1371/journal.pone.0257516)
Supplement: S1 Data — (XLSX) [file pone.0257516.s004.xlsx]

## Sheet: Sheet1
Your specialty								Please select the five most urgent COVID-19 MNCH research areas from the list below
Obstetrics and Gynaecology	Paediatrics	Sexual and Reproductive Health	Midwifery and nursing	Infectious Diseases	Public Health	Epidemiology	Other (please specify)	Access to maternal, sexual and reproductive healthcare among vulnerable groups during the COVID-19 pandemic	Access to healthcare for children during the COVID-19 pandemic	Direct impact of COVID-19 on pregnant and infant populations	Inclusion of pregnant women in COVID-19 vaccine trials	Inclusion of pregnant and breastfeeding women in COVID-19 treatment trials	Indirect effects of the COVID-19 pandemic on pregnant women, new mothers and infants	Immunological mechanisms of resilience against COVID-19 among children	Infection prevention and control	Mental health sequelae of COVID-19 pandemic in pregnancy and postpartum periods	Neurodevelopment of infants and young children exposed to COVID-19	Pathophysiology and long term sequelae of paediatric inflammation and multisystem syndrome (PIMS-TS)	Pathophysiological mechanisms of severe disease in children	Potential aerosolization of SARS-CoV-2 during second stage of labour	Prevention and treatment strategies for pregnant women and newborns in humanitarian settings	Safe breastfeeding	Screening for SARS-CoV-2 during the antenatal, peripartum and postpartum periods	Vertical transmission of COVID-19
			Midwifery and nursing							Direct impact of COVID-19 on pregnant and infant populations		Inclusion of pregnant and breastfeeding women in COVID-19 treatment trials				Mental health sequelae of COVID-19 pandemic in pregnancy and postpartum periods				Potential aerosolization of SARS-CoV-2 during second stage of labour				Vertical transmission of COVID-19
					Public Health			Access to maternal, sexual and reproductive healthcare among vulnerable groups during the COVID-19 pandemic		Direct impact of COVID-19 on pregnant and infant populations			Indirect effects of the COVID-19 pandemic on pregnant women, new mothers and infants			Mental health sequelae of COVID-19 pandemic in pregnancy and postpartum periods						Safe breastfeeding
Obstetrics and Gynaecology								Access to maternal, sexual and reproductive healthcare among vulnerable groups during the COVID-19 pandemic		Direct impact of COVID-19 on pregnant and infant populations	Inclusion of pregnant women in COVID-19 vaccine trials	Inclusion of pregnant and breastfeeding women in COVID-19 treatment trials			Infection prevention and control
					Public Health			Access to maternal, sexual and reproductive healthcare among vulnerable groups during the COVID-19 pandemic				Inclusion of pregnant and breastfeeding women in COVID-19 treatment trials								Potential aerosolization of SARS-CoV-2 during second stage of labour	Prevention and treatment strategies for pregnant women and newborns in humanitarian settings		Screening for SARS-CoV-2 during the antenatal, peripartum and postpartum periods
	Paediatrics			Infectious Diseases	Public Health	Epidemiology			Access to healthcare for children during the COVID-19 pandemic				Indirect effects of the COVID-19 pandemic on pregnant women, new mothers and infants		Infection prevention and control	Mental health sequelae of COVID-19 pandemic in pregnancy and postpartum periods	Neurodevelopment of infants and young children exposed to COVID-19
			Midwifery and nursing		Public Health			Access to maternal, sexual and reproductive healthcare among vulnerable groups during the COVID-19 pandemic	Access to healthcare for children during the COVID-19 pandemic				Indirect effects of the COVID-19 pandemic on pregnant women, new mothers and infants			Mental health sequelae of COVID-19 pandemic in pregnancy and postpartum periods						Safe breastfeeding
Obstetrics and Gynaecology										Direct impact of COVID-19 on pregnant and infant populations				Immunological mechanisms of resilience against COVID-19 among children	Infection prevention and control	Mental health sequelae of COVID-19 pandemic in pregnancy and postpartum periods								Vertical transmission of COVID-19
		Sexual and Reproductive Health						Access to maternal, sexual and reproductive healthcare among vulnerable groups during the COVID-19 pandemic					Indirect effects of the COVID-19 pandemic on pregnant women, new mothers and infants			Mental health sequelae of COVID-19 pandemic in pregnancy and postpartum periods							Screening for SARS-CoV-2 during the antenatal, peripartum and postpartum periods
Obstetrics and Gynaecology					Public Health			Access to maternal, sexual and reproductive healthcare among vulnerable groups during the COVID-19 pandemic		Direct impact of COVID-19 on pregnant and infant populations			Indirect effects of the COVID-19 pandemic on pregnant women, new mothers and infants			Mental health sequelae of COVID-19 pandemic in pregnancy and postpartum periods
Obstetrics and Gynaecology								Access to maternal, sexual and reproductive healthcare among vulnerable groups during the COVID-19 pandemic		Direct impact of COVID-19 on pregnant and infant populations						Mental health sequelae of COVID-19 pandemic in pregnancy and postpartum periods					Prevention and treatment strategies for pregnant women and newborns in humanitarian settings		Screening for SARS-CoV-2 during the antenatal, peripartum and postpartum periods
		Sexual and Reproductive Health				Epidemiology		Access to maternal, sexual and reproductive healthcare among vulnerable groups during the COVID-19 pandemic			Inclusion of pregnant women in COVID-19 vaccine trials				Infection prevention and control						Prevention and treatment strategies for pregnant women and newborns in humanitarian settings			Vertical transmission of COVID-19
Obstetrics and Gynaecology								Access to maternal, sexual and reproductive healthcare among vulnerable groups during the COVID-19 pandemic			Inclusion of pregnant women in COVID-19 vaccine trials
			Midwifery and nursing		Public Health			Access to maternal, sexual and reproductive healthcare among vulnerable groups during the COVID-19 pandemic
Obstetrics and Gynaecology								Access to maternal, sexual and reproductive healthcare among vulnerable groups during the COVID-19 pandemic		Direct impact of COVID-19 on pregnant and infant populations										Potential aerosolization of SARS-CoV-2 during second stage of labour			Screening for SARS-CoV-2 during the antenatal, peripartum and postpartum periods	Vertical transmission of COVID-19
					Public Health			Access to maternal, sexual and reproductive healthcare among vulnerable groups during the COVID-19 pandemic		Direct impact of COVID-19 on pregnant and infant populations		Inclusion of pregnant and breastfeeding women in COVID-19 treatment trials	Indirect effects of the COVID-19 pandemic on pregnant women, new mothers and infants		Infection prevention and control
	Paediatrics							Access to maternal, sexual and reproductive healthcare among vulnerable groups during the COVID-19 pandemic	Access to healthcare for children during the COVID-19 pandemic	Direct impact of COVID-19 on pregnant and infant populations
Obstetrics and Gynaecology									Access to healthcare for children during the COVID-19 pandemic		Inclusion of pregnant women in COVID-19 vaccine trials					Mental health sequelae of COVID-19 pandemic in pregnancy and postpartum periods					Prevention and treatment strategies for pregnant women and newborns in humanitarian settings			Vertical transmission of COVID-19
Obstetrics and Gynaecology								Access to maternal, sexual and reproductive healthcare among vulnerable groups during the COVID-19 pandemic
	Paediatrics								Access to healthcare for children during the COVID-19 pandemic				Indirect effects of the COVID-19 pandemic on pregnant women, new mothers and infants	Immunological mechanisms of resilience against COVID-19 among children			Neurodevelopment of infants and young children exposed to COVID-19	Pathophysiology and long term sequelae of paediatric inflammation and multisystem syndrome (PIMS-TS)
		Sexual and Reproductive Health			Public Health			Access to maternal, sexual and reproductive healthcare among vulnerable groups during the COVID-19 pandemic	Access to healthcare for children during the COVID-19 pandemic						Infection prevention and control						Prevention and treatment strategies for pregnant women and newborns in humanitarian settings		Screening for SARS-CoV-2 during the antenatal, peripartum and postpartum periods
		Sexual and Reproductive Health			Public Health			Access to maternal, sexual and reproductive healthcare among vulnerable groups during the COVID-19 pandemic	Access to healthcare for children during the COVID-19 pandemic	Direct impact of COVID-19 on pregnant and infant populations					Infection prevention and control	Mental health sequelae of COVID-19 pandemic in pregnancy and postpartum periods
Obstetrics and Gynaecology								Access to maternal, sexual and reproductive healthcare among vulnerable groups during the COVID-19 pandemic	Access to healthcare for children during the COVID-19 pandemic	Direct impact of COVID-19 on pregnant and infant populations				Immunological mechanisms of resilience against COVID-19 among children	Infection prevention and control
					Public Health			Access to maternal, sexual and reproductive healthcare among vulnerable groups during the COVID-19 pandemic	Access to healthcare for children during the COVID-19 pandemic		Inclusion of pregnant women in COVID-19 vaccine trials		Indirect effects of the COVID-19 pandemic on pregnant women, new mothers and infants			Mental health sequelae of COVID-19 pandemic in pregnancy and postpartum periods
							endocrinologyst	Access to maternal, sexual and reproductive healthcare among vulnerable groups during the COVID-19 pandemic		Direct impact of COVID-19 on pregnant and infant populations						Mental health sequelae of COVID-19 pandemic in pregnancy and postpartum periods	Neurodevelopment of infants and young children exposed to COVID-19							Vertical transmission of COVID-19
					Public Health			Access to maternal, sexual and reproductive healthcare among vulnerable groups during the COVID-19 pandemic			Inclusion of pregnant women in COVID-19 vaccine trials		Indirect effects of the COVID-19 pandemic on pregnant women, new mothers and infants			Mental health sequelae of COVID-19 pandemic in pregnancy and postpartum periods						Safe breastfeeding
Obstetrics and Gynaecology										Direct impact of COVID-19 on pregnant and infant populations
		Sexual and Reproductive Health			Public Health			Access to maternal, sexual and reproductive healthcare among vulnerable groups during the COVID-19 pandemic	Access to healthcare for children during the COVID-19 pandemic	Direct impact of COVID-19 on pregnant and infant populations			Indirect effects of the COVID-19 pandemic on pregnant women, new mothers and infants			Mental health sequelae of COVID-19 pandemic in pregnancy and postpartum periods
Obstetrics and Gynaecology								Access to maternal, sexual and reproductive healthcare among vulnerable groups during the COVID-19 pandemic								Mental health sequelae of COVID-19 pandemic in pregnancy and postpartum periods				Potential aerosolization of SARS-CoV-2 during second stage of labour		Safe breastfeeding		Vertical transmission of COVID-19
Obstetrics and Gynaecology										Direct impact of COVID-19 on pregnant and infant populations											Prevention and treatment strategies for pregnant women and newborns in humanitarian settings	Safe breastfeeding
Obstetrics and Gynaecology										Direct impact of COVID-19 on pregnant and infant populations			Indirect effects of the COVID-19 pandemic on pregnant women, new mothers and infants		Infection prevention and control	Mental health sequelae of COVID-19 pandemic in pregnancy and postpartum periods						Safe breastfeeding
Obstetrics and Gynaecology								Access to maternal, sexual and reproductive healthcare among vulnerable groups during the COVID-19 pandemic	Access to healthcare for children during the COVID-19 pandemic	Direct impact of COVID-19 on pregnant and infant populations		Inclusion of pregnant and breastfeeding women in COVID-19 treatment trials	Indirect effects of the COVID-19 pandemic on pregnant women, new mothers and infants
Obstetrics and Gynaecology										Direct impact of COVID-19 on pregnant and infant populations
Obstetrics and Gynaecology								Access to maternal, sexual and reproductive healthcare among vulnerable groups during the COVID-19 pandemic	Access to healthcare for children during the COVID-19 pandemic	Direct impact of COVID-19 on pregnant and infant populations	Inclusion of pregnant women in COVID-19 vaccine trials		Indirect effects of the COVID-19 pandemic on pregnant women, new mothers and infants
Obstetrics and Gynaecology								Access to maternal, sexual and reproductive healthcare among vulnerable groups during the COVID-19 pandemic	Access to healthcare for children during the COVID-19 pandemic			Inclusion of pregnant and breastfeeding women in COVID-19 treatment trials									Prevention and treatment strategies for pregnant women and newborns in humanitarian settings			Vertical transmission of COVID-19
Obstetrics and Gynaecology										Direct impact of COVID-19 on pregnant and infant populations			Indirect effects of the COVID-19 pandemic on pregnant women, new mothers and infants		Infection prevention and control	Mental health sequelae of COVID-19 pandemic in pregnancy and postpartum periods						Safe breastfeeding
				Infectious Diseases						Direct impact of COVID-19 on pregnant and infant populations						Mental health sequelae of COVID-19 pandemic in pregnancy and postpartum periods	Neurodevelopment of infants and young children exposed to COVID-19						Screening for SARS-CoV-2 during the antenatal, peripartum and postpartum periods	Vertical transmission of COVID-19
Obstetrics and Gynaecology								Access to maternal, sexual and reproductive healthcare among vulnerable groups during the COVID-19 pandemic		Direct impact of COVID-19 on pregnant and infant populations			Indirect effects of the COVID-19 pandemic on pregnant women, new mothers and infants			Mental health sequelae of COVID-19 pandemic in pregnancy and postpartum periods								Vertical transmission of COVID-19
Obstetrics and Gynaecology															Infection prevention and control	Mental health sequelae of COVID-19 pandemic in pregnancy and postpartum periods				Potential aerosolization of SARS-CoV-2 during second stage of labour	Prevention and treatment strategies for pregnant women and newborns in humanitarian settings		Screening for SARS-CoV-2 during the antenatal, peripartum and postpartum periods
Obstetrics and Gynaecology								Access to maternal, sexual and reproductive healthcare among vulnerable groups during the COVID-19 pandemic							Infection prevention and control							Safe breastfeeding	Screening for SARS-CoV-2 during the antenatal, peripartum and postpartum periods	Vertical transmission of COVID-19
Obstetrics and Gynaecology											Inclusion of pregnant women in COVID-19 vaccine trials	Inclusion of pregnant and breastfeeding women in COVID-19 treatment trials	Indirect effects of the COVID-19 pandemic on pregnant women, new mothers and infants		Infection prevention and control	Mental health sequelae of COVID-19 pandemic in pregnancy and postpartum periods
Obstetrics and Gynaecology												Inclusion of pregnant and breastfeeding women in COVID-19 treatment trials									Prevention and treatment strategies for pregnant women and newborns in humanitarian settings	Safe breastfeeding		Vertical transmission of COVID-19
Obstetrics and Gynaecology										Direct impact of COVID-19 on pregnant and infant populations	Inclusion of pregnant women in COVID-19 vaccine trials	Inclusion of pregnant and breastfeeding women in COVID-19 treatment trials										Safe breastfeeding	Screening for SARS-CoV-2 during the antenatal, peripartum and postpartum periods
Obstetrics and Gynaecology									Access to healthcare for children during the COVID-19 pandemic	Direct impact of COVID-19 on pregnant and infant populations		Inclusion of pregnant and breastfeeding women in COVID-19 treatment trials			Infection prevention and control							Safe breastfeeding
			Midwifery and nursing					Access to maternal, sexual and reproductive healthcare among vulnerable groups during the COVID-19 pandemic	Access to healthcare for children during the COVID-19 pandemic	Direct impact of COVID-19 on pregnant and infant populations			Indirect effects of the COVID-19 pandemic on pregnant women, new mothers and infants			Mental health sequelae of COVID-19 pandemic in pregnancy and postpartum periods
Obstetrics and Gynaecology										Direct impact of COVID-19 on pregnant and infant populations			Indirect effects of the COVID-19 pandemic on pregnant women, new mothers and infants			Mental health sequelae of COVID-19 pandemic in pregnancy and postpartum periods						Safe breastfeeding		Vertical transmission of COVID-19
Obstetrics and Gynaecology										Direct impact of COVID-19 on pregnant and infant populations	Inclusion of pregnant women in COVID-19 vaccine trials	Inclusion of pregnant and breastfeeding women in COVID-19 treatment trials			Infection prevention and control	Mental health sequelae of COVID-19 pandemic in pregnancy and postpartum periods
Obstetrics and Gynaecology									Access to healthcare for children during the COVID-19 pandemic
Obstetrics and Gynaecology										Direct impact of COVID-19 on pregnant and infant populations			Indirect effects of the COVID-19 pandemic on pregnant women, new mothers and infants		Infection prevention and control	Mental health sequelae of COVID-19 pandemic in pregnancy and postpartum periods				Potential aerosolization of SARS-CoV-2 during second stage of labour
Obstetrics and Gynaecology											Inclusion of pregnant women in COVID-19 vaccine trials
Obstetrics and Gynaecology								Access to maternal, sexual and reproductive healthcare among vulnerable groups during the COVID-19 pandemic		Direct impact of COVID-19 on pregnant and infant populations		Inclusion of pregnant and breastfeeding women in COVID-19 treatment trials	Indirect effects of the COVID-19 pandemic on pregnant women, new mothers and infants			Mental health sequelae of COVID-19 pandemic in pregnancy and postpartum periods
Obstetrics and Gynaecology													Indirect effects of the COVID-19 pandemic on pregnant women, new mothers and infants
Obstetrics and Gynaecology										Direct impact of COVID-19 on pregnant and infant populations			Indirect effects of the COVID-19 pandemic on pregnant women, new mothers and infants
Obstetrics and Gynaecology								Access to maternal, sexual and reproductive healthcare among vulnerable groups during the COVID-19 pandemic					Indirect effects of the COVID-19 pandemic on pregnant women, new mothers and infants		Infection prevention and control				Pathophysiological mechanisms of severe disease in children					Vertical transmission of COVID-19
Obstetrics and Gynaecology								Access to maternal, sexual and reproductive healthcare among vulnerable groups during the COVID-19 pandemic		Direct impact of COVID-19 on pregnant and infant populations	Inclusion of pregnant women in COVID-19 vaccine trials	Inclusion of pregnant and breastfeeding women in COVID-19 treatment trials				Mental health sequelae of COVID-19 pandemic in pregnancy and postpartum periods
Obstetrics and Gynaecology															Infection prevention and control
Obstetrics and Gynaecology										Direct impact of COVID-19 on pregnant and infant populations						Mental health sequelae of COVID-19 pandemic in pregnancy and postpartum periods
Obstetrics and Gynaecology								Access to maternal, sexual and reproductive healthcare among vulnerable groups during the COVID-19 pandemic	Access to healthcare for children during the COVID-19 pandemic	Direct impact of COVID-19 on pregnant and infant populations		Inclusion of pregnant and breastfeeding women in COVID-19 treatment trials		Immunological mechanisms of resilience against COVID-19 among children
Obstetrics and Gynaecology					Public Health			Access to maternal, sexual and reproductive healthcare among vulnerable groups during the COVID-19 pandemic		Direct impact of COVID-19 on pregnant and infant populations	Inclusion of pregnant women in COVID-19 vaccine trials	Inclusion of pregnant and breastfeeding women in COVID-19 treatment trials					Neurodevelopment of infants and young children exposed to COVID-19
Obstetrics and Gynaecology								Access to maternal, sexual and reproductive healthcare among vulnerable groups during the COVID-19 pandemic		Direct impact of COVID-19 on pregnant and infant populations					Infection prevention and control						Prevention and treatment strategies for pregnant women and newborns in humanitarian settings		Screening for SARS-CoV-2 during the antenatal, peripartum and postpartum periods
Obstetrics and Gynaecology								Access to maternal, sexual and reproductive healthcare among vulnerable groups during the COVID-19 pandemic
Obstetrics and Gynaecology								Access to maternal, sexual and reproductive healthcare among vulnerable groups during the COVID-19 pandemic	Access to healthcare for children during the COVID-19 pandemic				Indirect effects of the COVID-19 pandemic on pregnant women, new mothers and infants										Screening for SARS-CoV-2 during the antenatal, peripartum and postpartum periods	Vertical transmission of COVID-19
		Sexual and Reproductive Health			Public Health			Access to maternal, sexual and reproductive healthcare among vulnerable groups during the COVID-19 pandemic	Access to healthcare for children during the COVID-19 pandemic	Direct impact of COVID-19 on pregnant and infant populations			Indirect effects of the COVID-19 pandemic on pregnant women, new mothers and infants			Mental health sequelae of COVID-19 pandemic in pregnancy and postpartum periods
Obstetrics and Gynaecology		Sexual and Reproductive Health		Infectious Diseases	Public Health			Access to maternal, sexual and reproductive healthcare among vulnerable groups during the COVID-19 pandemic	Access to healthcare for children during the COVID-19 pandemic	Direct impact of COVID-19 on pregnant and infant populations				Immunological mechanisms of resilience against COVID-19 among children									Screening for SARS-CoV-2 during the antenatal, peripartum and postpartum periods
Obstetrics and Gynaecology								Access to maternal, sexual and reproductive healthcare among vulnerable groups during the COVID-19 pandemic				Inclusion of pregnant and breastfeeding women in COVID-19 treatment trials	Indirect effects of the COVID-19 pandemic on pregnant women, new mothers and infants			Mental health sequelae of COVID-19 pandemic in pregnancy and postpartum periods							Screening for SARS-CoV-2 during the antenatal, peripartum and postpartum periods
Obstetrics and Gynaecology								Access to maternal, sexual and reproductive healthcare among vulnerable groups during the COVID-19 pandemic	Access to healthcare for children during the COVID-19 pandemic					Immunological mechanisms of resilience against COVID-19 among children	Infection prevention and control	Mental health sequelae of COVID-19 pandemic in pregnancy and postpartum periods
Obstetrics and Gynaecology								Access to maternal, sexual and reproductive healthcare among vulnerable groups during the COVID-19 pandemic		Direct impact of COVID-19 on pregnant and infant populations		Inclusion of pregnant and breastfeeding women in COVID-19 treatment trials			Infection prevention and control									Vertical transmission of COVID-19
Obstetrics and Gynaecology								Access to maternal, sexual and reproductive healthcare among vulnerable groups during the COVID-19 pandemic					Indirect effects of the COVID-19 pandemic on pregnant women, new mothers and infants									Safe breastfeeding
Obstetrics and Gynaecology					Public Health				Access to healthcare for children during the COVID-19 pandemic						Infection prevention and control
Obstetrics and Gynaecology								Access to maternal, sexual and reproductive healthcare among vulnerable groups during the COVID-19 pandemic		Direct impact of COVID-19 on pregnant and infant populations	Inclusion of pregnant women in COVID-19 vaccine trials			Immunological mechanisms of resilience against COVID-19 among children										Vertical transmission of COVID-19
Obstetrics and Gynaecology								Access to maternal, sexual and reproductive healthcare among vulnerable groups during the COVID-19 pandemic	Access to healthcare for children during the COVID-19 pandemic	Direct impact of COVID-19 on pregnant and infant populations	Inclusion of pregnant women in COVID-19 vaccine trials	Inclusion of pregnant and breastfeeding women in COVID-19 treatment trials
							Maternal and Neonatal Health Specialist						Indirect effects of the COVID-19 pandemic on pregnant women, new mothers and infants	Immunological mechanisms of resilience against COVID-19 among children	Infection prevention and control	Mental health sequelae of COVID-19 pandemic in pregnancy and postpartum periods					Prevention and treatment strategies for pregnant women and newborns in humanitarian settings
Obstetrics and Gynaecology												Inclusion of pregnant and breastfeeding women in COVID-19 treatment trials			Infection prevention and control		Neurodevelopment of infants and young children exposed to COVID-19			Potential aerosolization of SARS-CoV-2 during second stage of labour				Vertical transmission of COVID-19
Obstetrics and Gynaecology										Direct impact of COVID-19 on pregnant and infant populations	Inclusion of pregnant women in COVID-19 vaccine trials	Inclusion of pregnant and breastfeeding women in COVID-19 treatment trials	Indirect effects of the COVID-19 pandemic on pregnant women, new mothers and infants		Infection prevention and control
Obstetrics and Gynaecology										Direct impact of COVID-19 on pregnant and infant populations	Inclusion of pregnant women in COVID-19 vaccine trials	Inclusion of pregnant and breastfeeding women in COVID-19 treatment trials	Indirect effects of the COVID-19 pandemic on pregnant women, new mothers and infants		Infection prevention and control
Obstetrics and Gynaecology								Access to maternal, sexual and reproductive healthcare among vulnerable groups during the COVID-19 pandemic	Access to healthcare for children during the COVID-19 pandemic	Direct impact of COVID-19 on pregnant and infant populations			Indirect effects of the COVID-19 pandemic on pregnant women, new mothers and infants	Immunological mechanisms of resilience against COVID-19 among children
Obstetrics and Gynaecology								Access to maternal, sexual and reproductive healthcare among vulnerable groups during the COVID-19 pandemic		Direct impact of COVID-19 on pregnant and infant populations			Indirect effects of the COVID-19 pandemic on pregnant women, new mothers and infants			Mental health sequelae of COVID-19 pandemic in pregnancy and postpartum periods				Potential aerosolization of SARS-CoV-2 during second stage of labour
Obstetrics and Gynaecology		Sexual and Reproductive Health						Access to maternal, sexual and reproductive healthcare among vulnerable groups during the COVID-19 pandemic		Direct impact of COVID-19 on pregnant and infant populations			Indirect effects of the COVID-19 pandemic on pregnant women, new mothers and infants			Mental health sequelae of COVID-19 pandemic in pregnancy and postpartum periods					Prevention and treatment strategies for pregnant women and newborns in humanitarian settings
	Paediatrics									Direct impact of COVID-19 on pregnant and infant populations					Infection prevention and control						Prevention and treatment strategies for pregnant women and newborns in humanitarian settings	Safe breastfeeding		Vertical transmission of COVID-19
Obstetrics and Gynaecology					Public Health						Inclusion of pregnant women in COVID-19 vaccine trials	Inclusion of pregnant and breastfeeding women in COVID-19 treatment trials			Infection prevention and control						Prevention and treatment strategies for pregnant women and newborns in humanitarian settings		Screening for SARS-CoV-2 during the antenatal, peripartum and postpartum periods
Obstetrics and Gynaecology		Sexual and Reproductive Health			Public Health			Access to maternal, sexual and reproductive healthcare among vulnerable groups during the COVID-19 pandemic		Direct impact of COVID-19 on pregnant and infant populations		Inclusion of pregnant and breastfeeding women in COVID-19 treatment trials				Mental health sequelae of COVID-19 pandemic in pregnancy and postpartum periods					Prevention and treatment strategies for pregnant women and newborns in humanitarian settings
Obstetrics and Gynaecology											Inclusion of pregnant women in COVID-19 vaccine trials	Inclusion of pregnant and breastfeeding women in COVID-19 treatment trials	Indirect effects of the COVID-19 pandemic on pregnant women, new mothers and infants
Obstetrics and Gynaecology				Infectious Diseases	Public Health						Inclusion of pregnant women in COVID-19 vaccine trials		Indirect effects of the COVID-19 pandemic on pregnant women, new mothers and infants		Infection prevention and control					Potential aerosolization of SARS-CoV-2 during second stage of labour	Prevention and treatment strategies for pregnant women and newborns in humanitarian settings
					Public Health			Access to maternal, sexual and reproductive healthcare among vulnerable groups during the COVID-19 pandemic	Access to healthcare for children during the COVID-19 pandemic						Infection prevention and control	Mental health sequelae of COVID-19 pandemic in pregnancy and postpartum periods							Screening for SARS-CoV-2 during the antenatal, peripartum and postpartum periods
				Infectious Diseases				Access to maternal, sexual and reproductive healthcare among vulnerable groups during the COVID-19 pandemic		Direct impact of COVID-19 on pregnant and infant populations	Inclusion of pregnant women in COVID-19 vaccine trials				Infection prevention and control					Potential aerosolization of SARS-CoV-2 during second stage of labour
					Public Health			Access to maternal, sexual and reproductive healthcare among vulnerable groups during the COVID-19 pandemic		Direct impact of COVID-19 on pregnant and infant populations			Indirect effects of the COVID-19 pandemic on pregnant women, new mothers and infants		Infection prevention and control									Vertical transmission of COVID-19
					Public Health			Access to maternal, sexual and reproductive healthcare among vulnerable groups during the COVID-19 pandemic	Access to healthcare for children during the COVID-19 pandemic	Direct impact of COVID-19 on pregnant and infant populations			Indirect effects of the COVID-19 pandemic on pregnant women, new mothers and infants		Infection prevention and control
		Sexual and Reproductive Health						Access to maternal, sexual and reproductive healthcare among vulnerable groups during the COVID-19 pandemic	Access to healthcare for children during the COVID-19 pandemic	Direct impact of COVID-19 on pregnant and infant populations			Indirect effects of the COVID-19 pandemic on pregnant women, new mothers and infants								Prevention and treatment strategies for pregnant women and newborns in humanitarian settings
Obstetrics and Gynaecology								Access to maternal, sexual and reproductive healthcare among vulnerable groups during the COVID-19 pandemic	Access to healthcare for children during the COVID-19 pandemic				Indirect effects of the COVID-19 pandemic on pregnant women, new mothers and infants	Immunological mechanisms of resilience against COVID-19 among children							Prevention and treatment strategies for pregnant women and newborns in humanitarian settings
		Sexual and Reproductive Health	Midwifery and nursing					Access to maternal, sexual and reproductive healthcare among vulnerable groups during the COVID-19 pandemic	Access to healthcare for children during the COVID-19 pandemic	Direct impact of COVID-19 on pregnant and infant populations			Indirect effects of the COVID-19 pandemic on pregnant women, new mothers and infants								Prevention and treatment strategies for pregnant women and newborns in humanitarian settings
				Infectious Diseases							Inclusion of pregnant women in COVID-19 vaccine trials										Prevention and treatment strategies for pregnant women and newborns in humanitarian settings		Screening for SARS-CoV-2 during the antenatal, peripartum and postpartum periods
	Paediatrics			Infectious Diseases					Access to healthcare for children during the COVID-19 pandemic	Direct impact of COVID-19 on pregnant and infant populations			Indirect effects of the COVID-19 pandemic on pregnant women, new mothers and infants	Immunological mechanisms of resilience against COVID-19 among children				Pathophysiology and long term sequelae of paediatric inflammation and multisystem syndrome (PIMS-TS)
				Infectious Diseases							Inclusion of pregnant women in COVID-19 vaccine trials				Infection prevention and control				Pathophysiological mechanisms of severe disease in children				Screening for SARS-CoV-2 during the antenatal, peripartum and postpartum periods	Vertical transmission of COVID-19
Obstetrics and Gynaecology					Public Health			Access to maternal, sexual and reproductive healthcare among vulnerable groups during the COVID-19 pandemic	Access to healthcare for children during the COVID-19 pandemic		Inclusion of pregnant women in COVID-19 vaccine trials	Inclusion of pregnant and breastfeeding women in COVID-19 treatment trials			Infection prevention and control
	Paediatrics								Access to healthcare for children during the COVID-19 pandemic					Immunological mechanisms of resilience against COVID-19 among children					Pathophysiological mechanisms of severe disease in children
	Paediatrics										Inclusion of pregnant women in COVID-19 vaccine trials	Inclusion of pregnant and breastfeeding women in COVID-19 treatment trials		Immunological mechanisms of resilience against COVID-19 among children	Infection prevention and control									Vertical transmission of COVID-19
	Paediatrics									Direct impact of COVID-19 on pregnant and infant populations				Immunological mechanisms of resilience against COVID-19 among children			Neurodevelopment of infants and young children exposed to COVID-19	Pathophysiology and long term sequelae of paediatric inflammation and multisystem syndrome (PIMS-TS)	Pathophysiological mechanisms of severe disease in children
	Paediatrics								Access to healthcare for children during the COVID-19 pandemic	Direct impact of COVID-19 on pregnant and infant populations				Immunological mechanisms of resilience against COVID-19 among children					Pathophysiological mechanisms of severe disease in children					Vertical transmission of COVID-19
	Paediatrics									Direct impact of COVID-19 on pregnant and infant populations			Indirect effects of the COVID-19 pandemic on pregnant women, new mothers and infants	Immunological mechanisms of resilience against COVID-19 among children				Pathophysiology and long term sequelae of paediatric inflammation and multisystem syndrome (PIMS-TS)	Pathophysiological mechanisms of severe disease in children
	Paediatrics								Access to healthcare for children during the COVID-19 pandemic								Neurodevelopment of infants and young children exposed to COVID-19	Pathophysiology and long term sequelae of paediatric inflammation and multisystem syndrome (PIMS-TS)	Pathophysiological mechanisms of severe disease in children					Vertical transmission of COVID-19
Obstétrique et Gynécologie								Accès aux soins de santé maternelle, sexuelle et reproductive des groupes vulnérables pendant la pandémie COVID-19		Impact direct du COVID-19 sur les populations enceintes et infantiles		Inclusion des femmes enceintes et allaitantes dans les essais de traitement COVID-19	Effets indirects de la pandémie de COVID-19 sur les populations enceintes et nourrissons		Prévention et contrôle des infections
Obstétrique et Gynécologie								Accès aux soins de santé maternelle, sexuelle et reproductive des groupes vulnérables pendant la pandémie COVID-19							Prévention et contrôle des infections							Allaitement sans risque	Dépistage du SRAS-CoV-2 pendant les périodes prénatale, péripartum et post-partum	Transmission verticale du COVID-19
Obstétrique et Gynécologie								Accès aux soins de santé maternelle, sexuelle et reproductive des groupes vulnérables pendant la pandémie COVID-19		Impact direct du COVID-19 sur les populations enceintes et infantiles		Inclusion des femmes enceintes et allaitantes dans les essais de traitement COVID-19	Effets indirects de la pandémie de COVID-19 sur les populations enceintes et nourrissons								Stratégies de prévention et de traitement pour les femmes enceintes et les nouveau-nés dans les situations humanitaires
Obstétrique et Gynécologie								Accès aux soins de santé maternelle, sexuelle et reproductive des groupes vulnérables pendant la pandémie COVID-19		Impact direct du COVID-19 sur les populations enceintes et infantiles							Neurodéveloppement des nourrissons et des jeunes enfants exposés au COVID-19					Allaitement sans risque	Dépistage du SRAS-CoV-2 pendant les périodes prénatale, péripartum et post-partum
Obstétrique et Gynécologie								Accès aux soins de santé maternelle, sexuelle et reproductive des groupes vulnérables pendant la pandémie COVID-19		Impact direct du COVID-19 sur les populations enceintes et infantiles			Effets indirects de la pandémie de COVID-19 sur les populations enceintes et nourrissons			Séquelles de santé mentale de la pandémie de COVID-19 pendant la grossesse et les périodes postnatales								Transmission verticale du COVID-19
Obstétrique et Gynécologie																								Transmission verticale du COVID-19
Obstétrique et Gynécologie		Santé sexuelle et reproductive						Accès aux soins de santé maternelle, sexuelle et reproductive des groupes vulnérables pendant la pandémie COVID-19					Effets indirects de la pandémie de COVID-19 sur les populations enceintes et nourrissons			Séquelles de santé mentale de la pandémie de COVID-19 pendant la grossesse et les périodes postnatales					Stratégies de prévention et de traitement pour les femmes enceintes et les nouveau-nés dans les situations humanitaires		Dépistage du SRAS-CoV-2 pendant les périodes prénatale, péripartum et post-partum
Obstétrique et Gynécologie								Accès aux soins de santé maternelle, sexuelle et reproductive des groupes vulnérables pendant la pandémie COVID-19		Impact direct du COVID-19 sur les populations enceintes et infantiles		Inclusion des femmes enceintes et allaitantes dans les essais de traitement COVID-19					Neurodéveloppement des nourrissons et des jeunes enfants exposés au COVID-19					Allaitement sans risque
Obstétrique et Gynécologie								Accès aux soins de santé maternelle, sexuelle et reproductive des groupes vulnérables pendant la pandémie COVID-19			Inclusion des femmes enceintes dans les essais de vaccin COVID-19
Obstétrique et Gynécologie										Impact direct du COVID-19 sur les populations enceintes et infantiles			Effets indirects de la pandémie de COVID-19 sur les populations enceintes et nourrissons	Mécanismes immunologiques de résilience contre le COVID-19 chez les enfants		Séquelles de santé mentale de la pandémie de COVID-19 pendant la grossesse et les périodes postnatales					Stratégies de prévention et de traitement pour les femmes enceintes et les nouveau-nés dans les situations humanitaires
Obstétrique et Gynécologie								Accès aux soins de santé maternelle, sexuelle et reproductive des groupes vulnérables pendant la pandémie COVID-19		Impact direct du COVID-19 sur les populations enceintes et infantiles	Inclusion des femmes enceintes dans les essais de vaccin COVID-19										Stratégies de prévention et de traitement pour les femmes enceintes et les nouveau-nés dans les situations humanitaires		Dépistage du SRAS-CoV-2 pendant les périodes prénatale, péripartum et post-partum
Obstétrique et Gynécologie								Accès aux soins de santé maternelle, sexuelle et reproductive des groupes vulnérables pendant la pandémie COVID-19		Impact direct du COVID-19 sur les populations enceintes et infantiles		Inclusion des femmes enceintes et allaitantes dans les essais de traitement COVID-19			Prévention et contrôle des infections					Aérosolisation potentielle du SRAS-CoV-2 pendant la deuxième étape d’accouchement
Obstétrique et Gynécologie																								Transmission verticale du COVID-19
Obstétrique et Gynécologie								Accès aux soins de santé maternelle, sexuelle et reproductive des groupes vulnérables pendant la pandémie COVID-19	Accès aux soins de santé pour les enfants pendant la pandémie COVID-19	Impact direct du COVID-19 sur les populations enceintes et infantiles					Prévention et contrôle des infections						Stratégies de prévention et de traitement pour les femmes enceintes et les nouveau-nés dans les situations humanitaires
Obstétrique et Gynécologie								Accès aux soins de santé maternelle, sexuelle et reproductive des groupes vulnérables pendant la pandémie COVID-19		Impact direct du COVID-19 sur les populations enceintes et infantiles										Aérosolisation potentielle du SRAS-CoV-2 pendant la deuxième étape d’accouchement	Stratégies de prévention et de traitement pour les femmes enceintes et les nouveau-nés dans les situations humanitaires		Dépistage du SRAS-CoV-2 pendant les périodes prénatale, péripartum et post-partum
Obstétrique et Gynécologie								Accès aux soins de santé maternelle, sexuelle et reproductive des groupes vulnérables pendant la pandémie COVID-19		Impact direct du COVID-19 sur les populations enceintes et infantiles			Effets indirects de la pandémie de COVID-19 sur les populations enceintes et nourrissons											Transmission verticale du COVID-19
Obstétrique et Gynécologie					Santé publique			Accès aux soins de santé maternelle, sexuelle et reproductive des groupes vulnérables pendant la pandémie COVID-19		Impact direct du COVID-19 sur les populations enceintes et infantiles	Inclusion des femmes enceintes dans les essais de vaccin COVID-19										Stratégies de prévention et de traitement pour les femmes enceintes et les nouveau-nés dans les situations humanitaires			Transmission verticale du COVID-19
						Epidemiología		Acceso a la atención de la salud materna, sexual y reproductiva entre los grupos vulnerables durante la pandemia COVID-19	Acceso a la atención sanitaria de los niños durante la pandemia COVID-19								Neurodesarrollo de lactantes y niños pequeños expuestos a COVID-19				Estrategias de prevención y tratamiento para mujeres embarazadas y recién nacidos en entornos humanitarios		Tamizaje de SARS-CoV-2 durante los períodos prenatal, periparto y posparto
	Pediatría															Secuelas de salud mental de la pandemia de covid-19 en el embarazo y período postnatal	Neurodesarrollo de lactantes y niños pequeños expuestos a COVID-19			Posible aerosolización del SARS-CoV-2 durante la segunda etapa del trabajo de parto		Lactancia materna segura		Transmisión vertical de COVID-19
							Agricultura y nutricion/ Etica en investigacion humana	Acceso a la atención de la salud materna, sexual y reproductiva entre los grupos vulnerables durante la pandemia COVID-19				Inclusión de mujeres embarazadas y lactantes en los ensayos de tratamiento COVID-19			Prevención y control de infecciones						Estrategias de prevención y tratamiento para mujeres embarazadas y recién nacidos en entornos humanitarios		Tamizaje de SARS-CoV-2 durante los períodos prenatal, periparto y posparto
							DERMATOLOGIA	Acceso a la atención de la salud materna, sexual y reproductiva entre los grupos vulnerables durante la pandemia COVID-19								Secuelas de salud mental de la pandemia de covid-19 en el embarazo y período postnatal		Fisiopatología y secuelas a largo plazo de inflamación pediátrica y síndrome multisistema (PIMS-TS)				Lactancia materna segura		Transmisión vertical de COVID-19
					Salud Pública	Epidemiología					Inclusión de mujeres embarazadas en los ensayos de vacunas COVID-19	Inclusión de mujeres embarazadas y lactantes en los ensayos de tratamiento COVID-19				Secuelas de salud mental de la pandemia de covid-19 en el embarazo y período postnatal					Estrategias de prevención y tratamiento para mujeres embarazadas y recién nacidos en entornos humanitarios		Tamizaje de SARS-CoV-2 durante los períodos prenatal, periparto y posparto
		Salud Sexual y Reproductiva						Acceso a la atención de la salud materna, sexual y reproductiva entre los grupos vulnerables durante la pandemia COVID-19	Acceso a la atención sanitaria de los niños durante la pandemia COVID-19	Impacto directo de COVID-19 en las poblaciones de embarazadas y de niños			Efectos indirectos de la pandemia COVID-19 en las poblaciones de embarazadas y de niños			Secuelas de salud mental de la pandemia de covid-19 en el embarazo y período postnatal
							Educación Especial			Impacto directo de COVID-19 en las poblaciones de embarazadas y de niños			Efectos indirectos de la pandemia COVID-19 en las poblaciones de embarazadas y de niños		Prevención y control de infecciones	Secuelas de salud mental de la pandemia de covid-19 en el embarazo y período postnatal	Neurodesarrollo de lactantes y niños pequeños expuestos a COVID-19
					Salud Pública			Acceso a la atención de la salud materna, sexual y reproductiva entre los grupos vulnerables durante la pandemia COVID-19					Efectos indirectos de la pandemia COVID-19 en las poblaciones de embarazadas y de niños			Secuelas de salud mental de la pandemia de covid-19 en el embarazo y período postnatal							Tamizaje de SARS-CoV-2 durante los períodos prenatal, periparto y posparto	Transmisión vertical de COVID-19
							Research ethics	Acceso a la atención de la salud materna, sexual y reproductiva entre los grupos vulnerables durante la pandemia COVID-19								Secuelas de salud mental de la pandemia de covid-19 en el embarazo y período postnatal
	Pediatría									Impacto directo de COVID-19 en las poblaciones de embarazadas y de niños		Inclusión de mujeres embarazadas y lactantes en los ensayos de tratamiento COVID-19		Mecanismos inmunológicos de resiliencia contra COVID-19 entre los niños	Prevención y control de infecciones		Neurodesarrollo de lactantes y niños pequeños expuestos a COVID-19
	Pediatría													Mecanismos inmunológicos de resiliencia contra COVID-19 entre los niños
				Enfermedades Infecciosas					Acceso a la atención sanitaria de los niños durante la pandemia COVID-19	Impacto directo de COVID-19 en las poblaciones de embarazadas y de niños		Inclusión de mujeres embarazadas y lactantes en los ensayos de tratamiento COVID-19					Neurodesarrollo de lactantes y niños pequeños expuestos a COVID-19	Fisiopatología y secuelas a largo plazo de inflamación pediátrica y síndrome multisistema (PIMS-TS)
					Salud Pública	Epidemiología		Acceso a la atención de la salud materna, sexual y reproductiva entre los grupos vulnerables durante la pandemia COVID-19			Inclusión de mujeres embarazadas en los ensayos de vacunas COVID-19	Inclusión de mujeres embarazadas y lactantes en los ensayos de tratamiento COVID-19				Secuelas de salud mental de la pandemia de covid-19 en el embarazo y período postnatal							Tamizaje de SARS-CoV-2 durante los períodos prenatal, periparto y posparto
	Pediatría					Epidemiología			Acceso a la atención sanitaria de los niños durante la pandemia COVID-19	Impacto directo de COVID-19 en las poblaciones de embarazadas y de niños			Efectos indirectos de la pandemia COVID-19 en las poblaciones de embarazadas y de niños					Fisiopatología y secuelas a largo plazo de inflamación pediátrica y síndrome multisistema (PIMS-TS)						Transmisión vertical de COVID-19
					Salud Pública			Acceso a la atención de la salud materna, sexual y reproductiva entre los grupos vulnerables durante la pandemia COVID-19	Acceso a la atención sanitaria de los niños durante la pandemia COVID-19		Inclusión de mujeres embarazadas en los ensayos de vacunas COVID-19					Secuelas de salud mental de la pandemia de covid-19 en el embarazo y período postnatal				Posible aerosolización del SARS-CoV-2 durante la segunda etapa del trabajo de parto
			Partería y Enfermería					Acceso a la atención de la salud materna, sexual y reproductiva entre los grupos vulnerables durante la pandemia COVID-19	Acceso a la atención sanitaria de los niños durante la pandemia COVID-19									Fisiopatología y secuelas a largo plazo de inflamación pediátrica y síndrome multisistema (PIMS-TS)		Posible aerosolización del SARS-CoV-2 durante la segunda etapa del trabajo de parto				Transmisión vertical de COVID-19
			Partería y Enfermería								Inclusión de mujeres embarazadas en los ensayos de vacunas COVID-19			Mecanismos inmunológicos de resiliencia contra COVID-19 entre los niños				Fisiopatología y secuelas a largo plazo de inflamación pediátrica y síndrome multisistema (PIMS-TS)				Lactancia materna segura		Transmisión vertical de COVID-19
						Epidemiología				Impacto directo de COVID-19 en las poblaciones de embarazadas y de niños			Efectos indirectos de la pandemia COVID-19 en las poblaciones de embarazadas y de niños	Mecanismos inmunológicos de resiliencia contra COVID-19 entre los niños			Neurodesarrollo de lactantes y niños pequeños expuestos a COVID-19						Tamizaje de SARS-CoV-2 durante los períodos prenatal, periparto y posparto
					Salud Pública			Acceso a la atención de la salud materna, sexual y reproductiva entre los grupos vulnerables durante la pandemia COVID-19	Acceso a la atención sanitaria de los niños durante la pandemia COVID-19	Impacto directo de COVID-19 en las poblaciones de embarazadas y de niños			Efectos indirectos de la pandemia COVID-19 en las poblaciones de embarazadas y de niños			Secuelas de salud mental de la pandemia de covid-19 en el embarazo y período postnatal
			Partería y Enfermería					Acceso a la atención de la salud materna, sexual y reproductiva entre los grupos vulnerables durante la pandemia COVID-19
Ginecología y Obstetricia								Acceso a la atención de la salud materna, sexual y reproductiva entre los grupos vulnerables durante la pandemia COVID-19	Acceso a la atención sanitaria de los niños durante la pandemia COVID-19					Mecanismos inmunológicos de resiliencia contra COVID-19 entre los niños									Tamizaje de SARS-CoV-2 durante los períodos prenatal, periparto y posparto	Transmisión vertical de COVID-19
		Salud Sexual y Reproductiva			Salud Pública		Terapeuta en adicciones y Drogodependencia	Acceso a la atención de la salud materna, sexual y reproductiva entre los grupos vulnerables durante la pandemia COVID-19		Impacto directo de COVID-19 en las poblaciones de embarazadas y de niños			Efectos indirectos de la pandemia COVID-19 en las poblaciones de embarazadas y de niños								Estrategias de prevención y tratamiento para mujeres embarazadas y recién nacidos en entornos humanitarios	Lactancia materna segura
			Partería y Enfermería							Impacto directo de COVID-19 en las poblaciones de embarazadas y de niños		Inclusión de mujeres embarazadas y lactantes en los ensayos de tratamiento COVID-19				Secuelas de salud mental de la pandemia de covid-19 en el embarazo y período postnatal							Tamizaje de SARS-CoV-2 durante los períodos prenatal, periparto y posparto	Transmisión vertical de COVID-19
						Epidemiología		Acceso a la atención de la salud materna, sexual y reproductiva entre los grupos vulnerables durante la pandemia COVID-19					Efectos indirectos de la pandemia COVID-19 en las poblaciones de embarazadas y de niños	Mecanismos inmunológicos de resiliencia contra COVID-19 entre los niños							Estrategias de prevención y tratamiento para mujeres embarazadas y recién nacidos en entornos humanitarios	Lactancia materna segura
							Médico General	Acceso a la atención de la salud materna, sexual y reproductiva entre los grupos vulnerables durante la pandemia COVID-19		Impacto directo de COVID-19 en las poblaciones de embarazadas y de niños						Secuelas de salud mental de la pandemia de covid-19 en el embarazo y período postnatal							Tamizaje de SARS-CoV-2 durante los períodos prenatal, periparto y posparto
						Epidemiología			Acceso a la atención sanitaria de los niños durante la pandemia COVID-19				Efectos indirectos de la pandemia COVID-19 en las poblaciones de embarazadas y de niños			Secuelas de salud mental de la pandemia de covid-19 en el embarazo y período postnatal	Neurodesarrollo de lactantes y niños pequeños expuestos a COVID-19	Fisiopatología y secuelas a largo plazo de inflamación pediátrica y síndrome multisistema (PIMS-TS)
					Salud Pública					Impacto directo de COVID-19 en las poblaciones de embarazadas y de niños			Efectos indirectos de la pandemia COVID-19 en las poblaciones de embarazadas y de niños			Secuelas de salud mental de la pandemia de covid-19 en el embarazo y período postnatal					Estrategias de prevención y tratamiento para mujeres embarazadas y recién nacidos en entornos humanitarios		Tamizaje de SARS-CoV-2 durante los períodos prenatal, periparto y posparto
	Pediatría									Impacto directo de COVID-19 en las poblaciones de embarazadas y de niños				Mecanismos inmunológicos de resiliencia contra COVID-19 entre los niños			Neurodesarrollo de lactantes y niños pequeños expuestos a COVID-19		Mecanismos fisiopatológicos de enfermedad grave en niños					Transmisión vertical de COVID-19
						Epidemiología	Personal de laboratorio										Neurodesarrollo de lactantes y niños pequeños expuestos a COVID-19			Posible aerosolización del SARS-CoV-2 durante la segunda etapa del trabajo de parto		Lactancia materna segura	Tamizaje de SARS-CoV-2 durante los períodos prenatal, periparto y posparto	Transmisión vertical de COVID-19
							Docencia Metodologica				Inclusión de mujeres embarazadas en los ensayos de vacunas COVID-19	Inclusión de mujeres embarazadas y lactantes en los ensayos de tratamiento COVID-19	Efectos indirectos de la pandemia COVID-19 en las poblaciones de embarazadas y de niños		Prevención y control de infecciones	Secuelas de salud mental de la pandemia de covid-19 en el embarazo y período postnatal
							Medico en Servicio Social		Acceso a la atención sanitaria de los niños durante la pandemia COVID-19			Inclusión de mujeres embarazadas y lactantes en los ensayos de tratamiento COVID-19	Efectos indirectos de la pandemia COVID-19 en las poblaciones de embarazadas y de niños									Lactancia materna segura
Ginecología y Obstetricia										Impacto directo de COVID-19 en las poblaciones de embarazadas y de niños			Efectos indirectos de la pandemia COVID-19 en las poblaciones de embarazadas y de niños				Neurodesarrollo de lactantes y niños pequeños expuestos a COVID-19							Transmisión vertical de COVID-19
							Medicina de Rehabilitación	Acceso a la atención de la salud materna, sexual y reproductiva entre los grupos vulnerables durante la pandemia COVID-19					Efectos indirectos de la pandemia COVID-19 en las poblaciones de embarazadas y de niños			Secuelas de salud mental de la pandemia de covid-19 en el embarazo y período postnatal		Fisiopatología y secuelas a largo plazo de inflamación pediátrica y síndrome multisistema (PIMS-TS)			Estrategias de prevención y tratamiento para mujeres embarazadas y recién nacidos en entornos humanitarios
							Psicoligía		Acceso a la atención sanitaria de los niños durante la pandemia COVID-19				Efectos indirectos de la pandemia COVID-19 en las poblaciones de embarazadas y de niños				Neurodesarrollo de lactantes y niños pequeños expuestos a COVID-19
Ginecología y Obstetricia										Impacto directo de COVID-19 en las poblaciones de embarazadas y de niños	Inclusión de mujeres embarazadas en los ensayos de vacunas COVID-19	Inclusión de mujeres embarazadas y lactantes en los ensayos de tratamiento COVID-19								Posible aerosolización del SARS-CoV-2 durante la segunda etapa del trabajo de parto				Transmisión vertical de COVID-19
						Epidemiología	Medicina física y Rehabilitación		Acceso a la atención sanitaria de los niños durante la pandemia COVID-19						Prevención y control de infecciones		Neurodesarrollo de lactantes y niños pequeños expuestos a COVID-19				Estrategias de prevención y tratamiento para mujeres embarazadas y recién nacidos en entornos humanitarios	Lactancia materna segura
Ginecología y Obstetricia								Acceso a la atención de la salud materna, sexual y reproductiva entre los grupos vulnerables durante la pandemia COVID-19		Impacto directo de COVID-19 en las poblaciones de embarazadas y de niños	Inclusión de mujeres embarazadas en los ensayos de vacunas COVID-19	Inclusión de mujeres embarazadas y lactantes en los ensayos de tratamiento COVID-19	Efectos indirectos de la pandemia COVID-19 en las poblaciones de embarazadas y de niños
Ginecología y Obstetricia								Acceso a la atención de la salud materna, sexual y reproductiva entre los grupos vulnerables durante la pandemia COVID-19	Acceso a la atención sanitaria de los niños durante la pandemia COVID-19	Impacto directo de COVID-19 en las poblaciones de embarazadas y de niños	Inclusión de mujeres embarazadas en los ensayos de vacunas COVID-19	Inclusión de mujeres embarazadas y lactantes en los ensayos de tratamiento COVID-19
Ginecología y Obstetricia								Acceso a la atención de la salud materna, sexual y reproductiva entre los grupos vulnerables durante la pandemia COVID-19		Impacto directo de COVID-19 en las poblaciones de embarazadas y de niños						Secuelas de salud mental de la pandemia de covid-19 en el embarazo y período postnatal				Posible aerosolización del SARS-CoV-2 durante la segunda etapa del trabajo de parto			Tamizaje de SARS-CoV-2 durante los períodos prenatal, periparto y posparto
Ginecología y Obstetricia								Acceso a la atención de la salud materna, sexual y reproductiva entre los grupos vulnerables durante la pandemia COVID-19		Impacto directo de COVID-19 en las poblaciones de embarazadas y de niños	Inclusión de mujeres embarazadas en los ensayos de vacunas COVID-19	Inclusión de mujeres embarazadas y lactantes en los ensayos de tratamiento COVID-19			Prevención y control de infecciones
	Pediatría																Neurodesarrollo de lactantes y niños pequeños expuestos a COVID-19	Fisiopatología y secuelas a largo plazo de inflamación pediátrica y síndrome multisistema (PIMS-TS)
	Pediatría								Acceso a la atención sanitaria de los niños durante la pandemia COVID-19														Tamizaje de SARS-CoV-2 durante los períodos prenatal, periparto y posparto	Transmisión vertical de COVID-19
	Pediatría													Mecanismos inmunológicos de resiliencia contra COVID-19 entre los niños	Prevención y control de infecciones	Secuelas de salud mental de la pandemia de covid-19 en el embarazo y período postnatal	Neurodesarrollo de lactantes y niños pequeños expuestos a COVID-19	Fisiopatología y secuelas a largo plazo de inflamación pediátrica y síndrome multisistema (PIMS-TS)
	Pediatría								Acceso a la atención sanitaria de los niños durante la pandemia COVID-19				Efectos indirectos de la pandemia COVID-19 en las poblaciones de embarazadas y de niños	Mecanismos inmunológicos de resiliencia contra COVID-19 entre los niños		Secuelas de salud mental de la pandemia de covid-19 en el embarazo y período postnatal	Neurodesarrollo de lactantes y niños pequeños expuestos a COVID-19
	Pediatría											Inclusión de mujeres embarazadas y lactantes en los ensayos de tratamiento COVID-19
	Pediatría								Acceso a la atención sanitaria de los niños durante la pandemia COVID-19			Inclusión de mujeres embarazadas y lactantes en los ensayos de tratamiento COVID-19		Mecanismos inmunológicos de resiliencia contra COVID-19 entre los niños		Secuelas de salud mental de la pandemia de covid-19 en el embarazo y período postnatal	Neurodesarrollo de lactantes y niños pequeños expuestos a COVID-19
	Pediatría																	Fisiopatología y secuelas a largo plazo de inflamación pediátrica y síndrome multisistema (PIMS-TS)						Transmisión vertical de COVID-19
	Pediatría								Acceso a la atención sanitaria de los niños durante la pandemia COVID-19					Mecanismos inmunológicos de resiliencia contra COVID-19 entre los niños	Prevención y control de infecciones			Fisiopatología y secuelas a largo plazo de inflamación pediátrica y síndrome multisistema (PIMS-TS)	Mecanismos fisiopatológicos de enfermedad grave en niños
	Pediatría							Acceso a la atención de la salud materna, sexual y reproductiva entre los grupos vulnerables durante la pandemia COVID-19		Impacto directo de COVID-19 en las poblaciones de embarazadas y de niños				Mecanismos inmunológicos de resiliencia contra COVID-19 entre los niños		Secuelas de salud mental de la pandemia de covid-19 en el embarazo y período postnatal
	Pediatría							Acceso a la atención de la salud materna, sexual y reproductiva entre los grupos vulnerables durante la pandemia COVID-19	Acceso a la atención sanitaria de los niños durante la pandemia COVID-19				Efectos indirectos de la pandemia COVID-19 en las poblaciones de embarazadas y de niños		Prevención y control de infecciones						Estrategias de prevención y tratamiento para mujeres embarazadas y recién nacidos en entornos humanitarios
	Pediatría							Acceso a la atención de la salud materna, sexual y reproductiva entre los grupos vulnerables durante la pandemia COVID-19
	Pediatría									Impacto directo de COVID-19 en las poblaciones de embarazadas y de niños				Mecanismos inmunológicos de resiliencia contra COVID-19 entre los niños								Lactancia materna segura		Transmisión vertical de COVID-19
	Pediatría								Acceso a la atención sanitaria de los niños durante la pandemia COVID-19	Impacto directo de COVID-19 en las poblaciones de embarazadas y de niños				Mecanismos inmunológicos de resiliencia contra COVID-19 entre los niños			Neurodesarrollo de lactantes y niños pequeños expuestos a COVID-19
	Pediatría										Inclusión de mujeres embarazadas en los ensayos de vacunas COVID-19										Estrategias de prevención y tratamiento para mujeres embarazadas y recién nacidos en entornos humanitarios	Lactancia materna segura	Tamizaje de SARS-CoV-2 durante los períodos prenatal, periparto y posparto	Transmisión vertical de COVID-19
	Pediatría							Acceso a la atención de la salud materna, sexual y reproductiva entre los grupos vulnerables durante la pandemia COVID-19	Acceso a la atención sanitaria de los niños durante la pandemia COVID-19	Impacto directo de COVID-19 en las poblaciones de embarazadas y de niños							Neurodesarrollo de lactantes y niños pequeños expuestos a COVID-19							Transmisión vertical de COVID-19
	Pediatría													Mecanismos inmunológicos de resiliencia contra COVID-19 entre los niños				Fisiopatología y secuelas a largo plazo de inflamación pediátrica y síndrome multisistema (PIMS-TS)	Mecanismos fisiopatológicos de enfermedad grave en niños
	Pediatría							Acceso a la atención de la salud materna, sexual y reproductiva entre los grupos vulnerables durante la pandemia COVID-19	Acceso a la atención sanitaria de los niños durante la pandemia COVID-19				Efectos indirectos de la pandemia COVID-19 en las poblaciones de embarazadas y de niños	Mecanismos inmunológicos de resiliencia contra COVID-19 entre los niños		Secuelas de salud mental de la pandemia de covid-19 en el embarazo y período postnatal
	Pediatría								Acceso a la atención sanitaria de los niños durante la pandemia COVID-19	Impacto directo de COVID-19 en las poblaciones de embarazadas y de niños					Prevención y control de infecciones		Neurodesarrollo de lactantes y niños pequeños expuestos a COVID-19				Estrategias de prevención y tratamiento para mujeres embarazadas y recién nacidos en entornos humanitarios
	Pediatría									Impacto directo de COVID-19 en las poblaciones de embarazadas y de niños		Inclusión de mujeres embarazadas y lactantes en los ensayos de tratamiento COVID-19		Mecanismos inmunológicos de resiliencia contra COVID-19 entre los niños	Prevención y control de infecciones			Fisiopatología y secuelas a largo plazo de inflamación pediátrica y síndrome multisistema (PIMS-TS)
	Pediatría								Acceso a la atención sanitaria de los niños durante la pandemia COVID-19
	Pediatría											Inclusión de mujeres embarazadas y lactantes en los ensayos de tratamiento COVID-19					Neurodesarrollo de lactantes y niños pequeños expuestos a COVID-19					Lactancia materna segura
	Pediatría									Impacto directo de COVID-19 en las poblaciones de embarazadas y de niños		Inclusión de mujeres embarazadas y lactantes en los ensayos de tratamiento COVID-19					Neurodesarrollo de lactantes y niños pequeños expuestos a COVID-19				Estrategias de prevención y tratamiento para mujeres embarazadas y recién nacidos en entornos humanitarios		Tamizaje de SARS-CoV-2 durante los períodos prenatal, periparto y posparto
	Pediatría							Acceso a la atención de la salud materna, sexual y reproductiva entre los grupos vulnerables durante la pandemia COVID-19		Impacto directo de COVID-19 en las poblaciones de embarazadas y de niños							Neurodesarrollo de lactantes y niños pequeños expuestos a COVID-19	Fisiopatología y secuelas a largo plazo de inflamación pediátrica y síndrome multisistema (PIMS-TS)					Tamizaje de SARS-CoV-2 durante los períodos prenatal, periparto y posparto
	Pediatría								Acceso a la atención sanitaria de los niños durante la pandemia COVID-19	Impacto directo de COVID-19 en las poblaciones de embarazadas y de niños	Inclusión de mujeres embarazadas en los ensayos de vacunas COVID-19	Inclusión de mujeres embarazadas y lactantes en los ensayos de tratamiento COVID-19						Fisiopatología y secuelas a largo plazo de inflamación pediátrica y síndrome multisistema (PIMS-TS)
	Pediatría										Inclusión de mujeres embarazadas en los ensayos de vacunas COVID-19	Inclusión de mujeres embarazadas y lactantes en los ensayos de tratamiento COVID-19											Tamizaje de SARS-CoV-2 durante los períodos prenatal, periparto y posparto
	Pediatría								Acceso a la atención sanitaria de los niños durante la pandemia COVID-19	Impacto directo de COVID-19 en las poblaciones de embarazadas y de niños		Inclusión de mujeres embarazadas y lactantes en los ensayos de tratamiento COVID-19					Neurodesarrollo de lactantes y niños pequeños expuestos a COVID-19	Fisiopatología y secuelas a largo plazo de inflamación pediátrica y síndrome multisistema (PIMS-TS)
	Pediatría							Acceso a la atención de la salud materna, sexual y reproductiva entre los grupos vulnerables durante la pandemia COVID-19		Impacto directo de COVID-19 en las poblaciones de embarazadas y de niños
	Pediatría									Impacto directo de COVID-19 en las poblaciones de embarazadas y de niños		Inclusión de mujeres embarazadas y lactantes en los ensayos de tratamiento COVID-19	Efectos indirectos de la pandemia COVID-19 en las poblaciones de embarazadas y de niños				Neurodesarrollo de lactantes y niños pequeños expuestos a COVID-19						Tamizaje de SARS-CoV-2 durante los períodos prenatal, periparto y posparto
	Pediatría								Acceso a la atención sanitaria de los niños durante la pandemia COVID-19		Inclusión de mujeres embarazadas en los ensayos de vacunas COVID-19						Neurodesarrollo de lactantes y niños pequeños expuestos a COVID-19					Lactancia materna segura	Tamizaje de SARS-CoV-2 durante los períodos prenatal, periparto y posparto
	Pediatría								Acceso a la atención sanitaria de los niños durante la pandemia COVID-19	Impacto directo de COVID-19 en las poblaciones de embarazadas y de niños					Prevención y control de infecciones				Mecanismos fisiopatológicos de enfermedad grave en niños	Posible aerosolización del SARS-CoV-2 durante la segunda etapa del trabajo de parto
	Pediatría							Acceso a la atención de la salud materna, sexual y reproductiva entre los grupos vulnerables durante la pandemia COVID-19	Acceso a la atención sanitaria de los niños durante la pandemia COVID-19	Impacto directo de COVID-19 en las poblaciones de embarazadas y de niños								Fisiopatología y secuelas a largo plazo de inflamación pediátrica y síndrome multisistema (PIMS-TS)	Mecanismos fisiopatológicos de enfermedad grave en niños
	Pediatría								Acceso a la atención sanitaria de los niños durante la pandemia COVID-19	Impacto directo de COVID-19 en las poblaciones de embarazadas y de niños							Neurodesarrollo de lactantes y niños pequeños expuestos a COVID-19					Lactancia materna segura	Tamizaje de SARS-CoV-2 durante los períodos prenatal, periparto y posparto
	Pediatría										Inclusión de mujeres embarazadas en los ensayos de vacunas COVID-19	Inclusión de mujeres embarazadas y lactantes en los ensayos de tratamiento COVID-19	Efectos indirectos de la pandemia COVID-19 en las poblaciones de embarazadas y de niños	Mecanismos inmunológicos de resiliencia contra COVID-19 entre los niños	Prevención y control de infecciones
	Pediatría							Acceso a la atención de la salud materna, sexual y reproductiva entre los grupos vulnerables durante la pandemia COVID-19	Acceso a la atención sanitaria de los niños durante la pandemia COVID-19	Impacto directo de COVID-19 en las poblaciones de embarazadas y de niños		Inclusión de mujeres embarazadas y lactantes en los ensayos de tratamiento COVID-19										Lactancia materna segura
	Pediatría								Acceso a la atención sanitaria de los niños durante la pandemia COVID-19								Neurodesarrollo de lactantes y niños pequeños expuestos a COVID-19	Fisiopatología y secuelas a largo plazo de inflamación pediátrica y síndrome multisistema (PIMS-TS)					Tamizaje de SARS-CoV-2 durante los períodos prenatal, periparto y posparto	Transmisión vertical de COVID-19
	Pediatría										Inclusión de mujeres embarazadas en los ensayos de vacunas COVID-19	Inclusión de mujeres embarazadas y lactantes en los ensayos de tratamiento COVID-19								Posible aerosolización del SARS-CoV-2 durante la segunda etapa del trabajo de parto			Tamizaje de SARS-CoV-2 durante los períodos prenatal, periparto y posparto	Transmisión vertical de COVID-19
	Pediatría								Acceso a la atención sanitaria de los niños durante la pandemia COVID-19	Impacto directo de COVID-19 en las poblaciones de embarazadas y de niños				Mecanismos inmunológicos de resiliencia contra COVID-19 entre los niños			Neurodesarrollo de lactantes y niños pequeños expuestos a COVID-19
	Pediatría									Impacto directo de COVID-19 en las poblaciones de embarazadas y de niños				Mecanismos inmunológicos de resiliencia contra COVID-19 entre los niños					Mecanismos fisiopatológicos de enfermedad grave en niños			Lactancia materna segura
	Pediatría							Acceso a la atención de la salud materna, sexual y reproductiva entre los grupos vulnerables durante la pandemia COVID-19			Inclusión de mujeres embarazadas en los ensayos de vacunas COVID-19	Inclusión de mujeres embarazadas y lactantes en los ensayos de tratamiento COVID-19		Mecanismos inmunológicos de resiliencia contra COVID-19 entre los niños				Fisiopatología y secuelas a largo plazo de inflamación pediátrica y síndrome multisistema (PIMS-TS)
	Pediatría								Acceso a la atención sanitaria de los niños durante la pandemia COVID-19	Impacto directo de COVID-19 en las poblaciones de embarazadas y de niños			Efectos indirectos de la pandemia COVID-19 en las poblaciones de embarazadas y de niños				Neurodesarrollo de lactantes y niños pequeños expuestos a COVID-19			Posible aerosolización del SARS-CoV-2 durante la segunda etapa del trabajo de parto
	Pediatría										Inclusión de mujeres embarazadas en los ensayos de vacunas COVID-19						Neurodesarrollo de lactantes y niños pequeños expuestos a COVID-19					Lactancia materna segura	Tamizaje de SARS-CoV-2 durante los períodos prenatal, periparto y posparto	Transmisión vertical de COVID-19
				Enfermedades Infecciosas					Acceso a la atención sanitaria de los niños durante la pandemia COVID-19					Mecanismos inmunológicos de resiliencia contra COVID-19 entre los niños	Prevención y control de infecciones							Lactancia materna segura		Transmisión vertical de COVID-19
	Pediatría								Acceso a la atención sanitaria de los niños durante la pandemia COVID-19	Impacto directo de COVID-19 en las poblaciones de embarazadas y de niños	Inclusión de mujeres embarazadas en los ensayos de vacunas COVID-19							Fisiopatología y secuelas a largo plazo de inflamación pediátrica y síndrome multisistema (PIMS-TS)					Tamizaje de SARS-CoV-2 durante los períodos prenatal, periparto y posparto
	Pediatría							Acceso a la atención de la salud materna, sexual y reproductiva entre los grupos vulnerables durante la pandemia COVID-19	Acceso a la atención sanitaria de los niños durante la pandemia COVID-19									Fisiopatología y secuelas a largo plazo de inflamación pediátrica y síndrome multisistema (PIMS-TS)			Estrategias de prevención y tratamiento para mujeres embarazadas y recién nacidos en entornos humanitarios		Tamizaje de SARS-CoV-2 durante los períodos prenatal, periparto y posparto
	Pediatría												Efectos indirectos de la pandemia COVID-19 en las poblaciones de embarazadas y de niños	Mecanismos inmunológicos de resiliencia contra COVID-19 entre los niños	Prevención y control de infecciones	Secuelas de salud mental de la pandemia de covid-19 en el embarazo y período postnatal	Neurodesarrollo de lactantes y niños pequeños expuestos a COVID-19
	Pediatría									Impacto directo de COVID-19 en las poblaciones de embarazadas y de niños				Mecanismos inmunológicos de resiliencia contra COVID-19 entre los niños			Neurodesarrollo de lactantes y niños pequeños expuestos a COVID-19	Fisiopatología y secuelas a largo plazo de inflamación pediátrica y síndrome multisistema (PIMS-TS)						Transmisión vertical de COVID-19
	Pediatría									Impacto directo de COVID-19 en las poblaciones de embarazadas y de niños	Inclusión de mujeres embarazadas en los ensayos de vacunas COVID-19						Neurodesarrollo de lactantes y niños pequeños expuestos a COVID-19			Posible aerosolización del SARS-CoV-2 durante la segunda etapa del trabajo de parto		Lactancia materna segura
	Pediatría							Acceso a la atención de la salud materna, sexual y reproductiva entre los grupos vulnerables durante la pandemia COVID-19		Impacto directo de COVID-19 en las poblaciones de embarazadas y de niños		Inclusión de mujeres embarazadas y lactantes en los ensayos de tratamiento COVID-19		Mecanismos inmunológicos de resiliencia contra COVID-19 entre los niños			Neurodesarrollo de lactantes y niños pequeños expuestos a COVID-19
	Pediatría												Efectos indirectos de la pandemia COVID-19 en las poblaciones de embarazadas y de niños			Secuelas de salud mental de la pandemia de covid-19 en el embarazo y período postnatal	Neurodesarrollo de lactantes y niños pequeños expuestos a COVID-19				Estrategias de prevención y tratamiento para mujeres embarazadas y recién nacidos en entornos humanitarios			Transmisión vertical de COVID-19
	Pediatría								Acceso a la atención sanitaria de los niños durante la pandemia COVID-19
	Pediatría							Acceso a la atención de la salud materna, sexual y reproductiva entre los grupos vulnerables durante la pandemia COVID-19																Transmisión vertical de COVID-19
	Pediatría									Impacto directo de COVID-19 en las poblaciones de embarazadas y de niños			Efectos indirectos de la pandemia COVID-19 en las poblaciones de embarazadas y de niños				Neurodesarrollo de lactantes y niños pequeños expuestos a COVID-19				Estrategias de prevención y tratamiento para mujeres embarazadas y recién nacidos en entornos humanitarios		Tamizaje de SARS-CoV-2 durante los períodos prenatal, periparto y posparto
	Pediatría													Mecanismos inmunológicos de resiliencia contra COVID-19 entre los niños		Secuelas de salud mental de la pandemia de covid-19 en el embarazo y período postnatal	Neurodesarrollo de lactantes y niños pequeños expuestos a COVID-19		Mecanismos fisiopatológicos de enfermedad grave en niños					Transmisión vertical de COVID-19
	Pediatría								Acceso a la atención sanitaria de los niños durante la pandemia COVID-19			Inclusión de mujeres embarazadas y lactantes en los ensayos de tratamiento COVID-19						Fisiopatología y secuelas a largo plazo de inflamación pediátrica y síndrome multisistema (PIMS-TS)	Mecanismos fisiopatológicos de enfermedad grave en niños				Tamizaje de SARS-CoV-2 durante los períodos prenatal, periparto y posparto
	Pediatría								Acceso a la atención sanitaria de los niños durante la pandemia COVID-19	Impacto directo de COVID-19 en las poblaciones de embarazadas y de niños										Posible aerosolización del SARS-CoV-2 durante la segunda etapa del trabajo de parto			Tamizaje de SARS-CoV-2 durante los períodos prenatal, periparto y posparto	Transmisión vertical de COVID-19
	Pediatría							Acceso a la atención de la salud materna, sexual y reproductiva entre los grupos vulnerables durante la pandemia COVID-19		Impacto directo de COVID-19 en las poblaciones de embarazadas y de niños				Mecanismos inmunológicos de resiliencia contra COVID-19 entre los niños			Neurodesarrollo de lactantes y niños pequeños expuestos a COVID-19	Fisiopatología y secuelas a largo plazo de inflamación pediátrica y síndrome multisistema (PIMS-TS)
	Pediatría												Efectos indirectos de la pandemia COVID-19 en las poblaciones de embarazadas y de niños	Mecanismos inmunológicos de resiliencia contra COVID-19 entre los niños			Neurodesarrollo de lactantes y niños pequeños expuestos a COVID-19	Fisiopatología y secuelas a largo plazo de inflamación pediátrica y síndrome multisistema (PIMS-TS)	Mecanismos fisiopatológicos de enfermedad grave en niños
	Pediatría																Neurodesarrollo de lactantes y niños pequeños expuestos a COVID-19	Fisiopatología y secuelas a largo plazo de inflamación pediátrica y síndrome multisistema (PIMS-TS)	Mecanismos fisiopatológicos de enfermedad grave en niños			Lactancia materna segura		Transmisión vertical de COVID-19
							Neonatologia			Impacto directo de COVID-19 en las poblaciones de embarazadas y de niños		Inclusión de mujeres embarazadas y lactantes en los ensayos de tratamiento COVID-19			Prevención y control de infecciones			Fisiopatología y secuelas a largo plazo de inflamación pediátrica y síndrome multisistema (PIMS-TS)			Estrategias de prevención y tratamiento para mujeres embarazadas y recién nacidos en entornos humanitarios
	Pediatría																	Fisiopatología y secuelas a largo plazo de inflamación pediátrica y síndrome multisistema (PIMS-TS)	Mecanismos fisiopatológicos de enfermedad grave en niños	Posible aerosolización del SARS-CoV-2 durante la segunda etapa del trabajo de parto			Tamizaje de SARS-CoV-2 durante los períodos prenatal, periparto y posparto	Transmisión vertical de COVID-19
	Pediatría								Acceso a la atención sanitaria de los niños durante la pandemia COVID-19	Impacto directo de COVID-19 en las poblaciones de embarazadas y de niños		Inclusión de mujeres embarazadas y lactantes en los ensayos de tratamiento COVID-19						Fisiopatología y secuelas a largo plazo de inflamación pediátrica y síndrome multisistema (PIMS-TS)					Tamizaje de SARS-CoV-2 durante los períodos prenatal, periparto y posparto
	Pediatría							Acceso a la atención de la salud materna, sexual y reproductiva entre los grupos vulnerables durante la pandemia COVID-19		Impacto directo de COVID-19 en las poblaciones de embarazadas y de niños						Secuelas de salud mental de la pandemia de covid-19 en el embarazo y período postnatal	Neurodesarrollo de lactantes y niños pequeños expuestos a COVID-19					Lactancia materna segura
	Pediatría							Acceso a la atención de la salud materna, sexual y reproductiva entre los grupos vulnerables durante la pandemia COVID-19		Impacto directo de COVID-19 en las poblaciones de embarazadas y de niños								Fisiopatología y secuelas a largo plazo de inflamación pediátrica y síndrome multisistema (PIMS-TS)				Lactancia materna segura		Transmisión vertical de COVID-19
	Pediatría									Impacto directo de COVID-19 en las poblaciones de embarazadas y de niños										Posible aerosolización del SARS-CoV-2 durante la segunda etapa del trabajo de parto		Lactancia materna segura	Tamizaje de SARS-CoV-2 durante los períodos prenatal, periparto y posparto	Transmisión vertical de COVID-19
	Pediatría						Cirugía Pediatrica						Efectos indirectos de la pandemia COVID-19 en las poblaciones de embarazadas y de niños		Prevención y control de infecciones
	Pediatría								Acceso a la atención sanitaria de los niños durante la pandemia COVID-19	Impacto directo de COVID-19 en las poblaciones de embarazadas y de niños											Estrategias de prevención y tratamiento para mujeres embarazadas y recién nacidos en entornos humanitarios		Tamizaje de SARS-CoV-2 durante los períodos prenatal, periparto y posparto	Transmisión vertical de COVID-19
	Pediatría							Acceso a la atención de la salud materna, sexual y reproductiva entre los grupos vulnerables durante la pandemia COVID-19	Acceso a la atención sanitaria de los niños durante la pandemia COVID-19	Impacto directo de COVID-19 en las poblaciones de embarazadas y de niños					Prevención y control de infecciones		Neurodesarrollo de lactantes y niños pequeños expuestos a COVID-19
							Cuidados intensivos pediatricos		Acceso a la atención sanitaria de los niños durante la pandemia COVID-19	Impacto directo de COVID-19 en las poblaciones de embarazadas y de niños		Inclusión de mujeres embarazadas y lactantes en los ensayos de tratamiento COVID-19		Mecanismos inmunológicos de resiliencia contra COVID-19 entre los niños				Fisiopatología y secuelas a largo plazo de inflamación pediátrica y síndrome multisistema (PIMS-TS)
	Pediatría							Acceso a la atención de la salud materna, sexual y reproductiva entre los grupos vulnerables durante la pandemia COVID-19					Efectos indirectos de la pandemia COVID-19 en las poblaciones de embarazadas y de niños		Prevención y control de infecciones		Neurodesarrollo de lactantes y niños pequeños expuestos a COVID-19					Lactancia materna segura
