# Supplementary material for: Global research priorities for COVID-19 in maternal, reproductive and child health: Results of an international survey
Source: PLoS One. 2021 Sep 24;16(9):e0257516. doi: 10.1371/journal.pone.0257516 (PMC8462675; doi:10.1371/journal.pone.0257516)
Supplement: S2 Data — (XLSX) [file pone.0257516.s005.xlsx]

## Sheet: Combined data
Please rank the 10 research priorities from the list below (MOST important = 1, LEAST important=10)										Do you think these 10 priorities accurately reflect the MNCH research priorities in your region?	If no, please provide details of additional research priorities which should be considered:	Are the research priorities understandable in their current format?	If no, please provide comment:	Any additional comments?
Access to healthcare for children during the COVID-19 pandemic	Access to maternal, sexual and reproductive healthcare among vulnerable groups during the COVID-19 pandemic	Direct impact of COVID-19 on pregnant and infant populations	Inclusion of pregnant and breastfeeding women in COVID-19 treatment trials	Indirect effects of the COVID-19 pandemic on pregnant and infant populations	Infection prevention and control	Mental health sequelae of COVID-19 pandemic in pregnancy and postnatal periods	Neurodevelopment of infants and young children exposed to COVID-19	Screening for SARS-CoV-2 during the antenatal, peripartum and postpartum periods	Vertical transmission of COVID-19	Response	Open-Ended Response	Response	Open-Ended Response	Open-Ended Response
5	6		1							Yes		Yes		ALL OK
2	3	1	4	5	7	10	6	9	8	Yes	NA	Yes	NA	NA
3	2	1	5	6	4	7	8	9	10	Yes		Yes
7	8	3	10	4	5	9	1	2	6	Yes		Yes
1	2	3	8	7	4	10	9	5	6	Yes		Yes		Thank you
3	2	8	5	1	7	6	4	9	10	Yes	N/A	No	It is difficult to distinguish between priorities for research and priorities for provision of services. I have answered using a mixture of both. For example I have prioritised the indirect effects of COVID on SRH, but actually I mean that this is a very important issue that needs to be addressed in service provision - not simply researched.	No
7	4	3	1	8	2	9	10	6	5	No	Impact of COVID on STI testing and lonf term consequence	Yes	NA	no
2	1	5	6	3	7	8	4	10	9	Yes	Knowledge, attitude and perception of health workers towards provision of MNCH services in the Covid 19 pandemic	Yes	The topic on Infection prevention and control: if it could be more specific to Covid 19	Is it acceptable to adopt some of the topics for academic or personal professional purposes /development
6	10	1	5	2	3	9	4	8	7	No	More research required on indirect impacts and longer term sequelae on physical and neurodevelopmental health.	Yes
6	3	5	4	10	7	9	8	1	2	Yes		Yes
3	2	7	8	4	1	6	5	10	9	Yes		Yes
3	2	5	4	1	6	7	8	9	10	Yes		Yes
2	1	8	6	10	4	5	7	9	3	No	Pschosocial support for.maternal health providers	Yes
1	6	8	10	7	5	4	3	2	9	Yes		Yes		NO
2	9	1	10	7	3	4	8	6	5	Yes		Yes		None
8	1	6	5	3	4	7	10	2	9	Yes		Yes
5	7	4	2	3	9	6	1	10	8	Yes		Yes		no
4	2	1	5	3	6	8	7	9	10	Yes		Yes
1	4	2	5	3	6	7	9	8	10	Yes		Yes
	5				6	8		9	10	Si	investigación sobre fármacos para Covid 19	Si	son comprensibles	ninguno
2	1	3	7	5	4	8	6	9	10	Si		Si
2	3	4	5	6	10	7	8	1	9	Si	Estoy de Acuerdo	Si	No tengo comentario	Ninguno
5	8	6	7	10	1	9	4	3	2	Si		Si
3	1	2	7	8	6	10	5	4	9	Si		Si
				7			9	8	6	Si		Si
8	1	5	2	7	3	10	9	6	4	Si	Respuesta positiva	Si	Respuesta positiva	Priorizar vacunacion contra SARS COV 2. que la vacuna sea lo más accesible posible
2	10	1	7	8	3	9	4	6	5	Si		Si	Ninguno.	ninguno
1	4	10	2	3	6	5	9	7	8	Si		Si		Ninguno
1	3	4	5	2	7	6	8	9	10	Si		Si		No
4	1	5	2	3	6	7	8	9	10	Si		Si		No
7	1	3	9	4	6	10	8	2	5	No	Monitoreo y Desarrollo de programas de atención, evaluación de programas de Atencion vigentes, alcances de los programas de Atencion vigentes, implementación de la investigación,	Si	Ninguno	Ninguno
2	8	6	4	7	5	10	9	3	1	Si		Si		Se debe enfatizar en buscar posibles efectos de n el feto y neonato
9	3	4	10	5	6	7	8	1	2	Si		Si
6	1	4	10	3	5	9	2	8	7	Si		Si
9	2	5	1	6	10	7	8	4	3	Si		Si
2	3	10	7	8	6	9	1	5	4	No	Gravedad de las nuevas cepas descubiertas en niños.	Si	NA	NA
5	10	6	1	3	9	8	7	2	4	Si		Si		No
9	5	1	3	2	10	7	4	6	8	Si		Si		Gracias por tomar en cuenta mi opinion
6	7	5	4	1	9	8	2	10	3	Si	Cobertura de vacunación por SARS-COV2 en grupos vulnerables	Si	Considero que son comprensibles	Se podría presentar los resultados de manera gráfica
6	10	7	1	9	8	5	4	2	3	Si		Si
	6	4		3			7	2	1	Si		Si
4	6	10	7	9	5	1	3	2	8	Si	Vacunas en niños	Si
1	2	6	3	5	4	7	8	9	10	Si		Si
1	2	4	5	3	6	7	8	9	10	Si		Si		Ninguno
4	7	1	3	10	8	6	5	9	2	Si		Si
9	2	4	8	5	6	1	3	7	10	Oui		Oui		Il est crucial de cerner les mecanismes de l'infection à la covid-19, les réactions de l'organisme,et les facteurs susceptibles de booster favorablrment cette réaction. Le champ de recherche paraît plus vaste qu'on ne l'imagine à priori...
8	7	6	10	5	9	4	3	1	2	Oui	Accompagnement psychologique des femmes enceintes post covid	Oui		Non
187	194	198	234	234	254	316	272	277	302
3.97872	4.12766	4.21277	4.97872	4.97872	5.40426	6.7234	5.78723	5.89362	6.42553
